# Supplementary material for: Characterization of Human Pseudogene-Derived Non-Coding RNAs for Functional Potential
Source: PubMed Central journal article supplement (PMC3974860; doi:10.1371/journal.pone.0093972), 2014-04-03

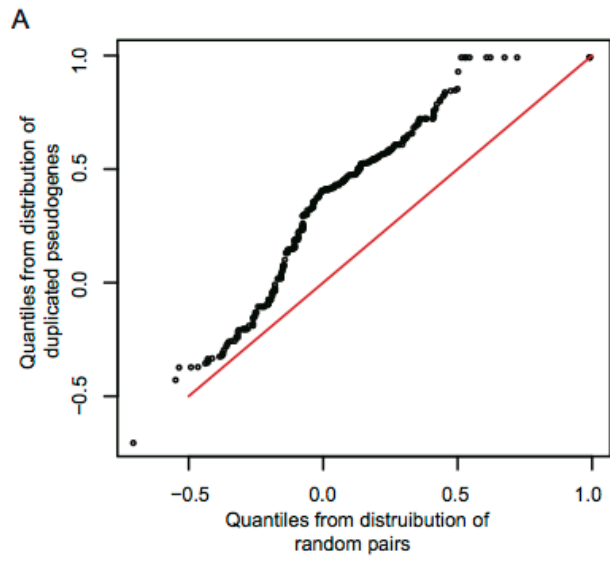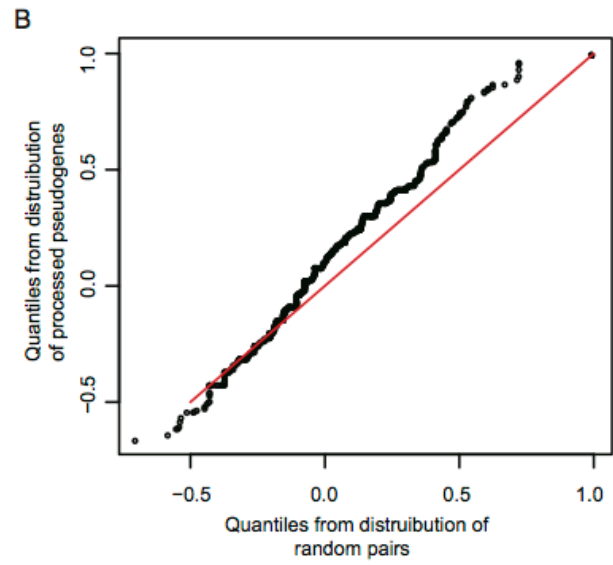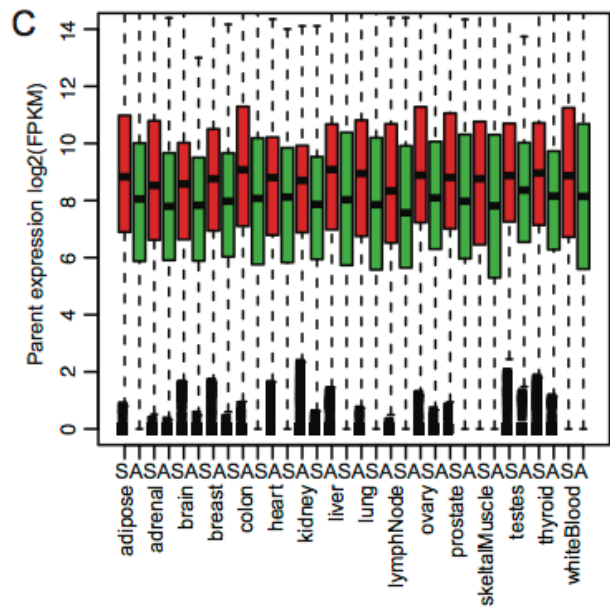

Supplement: pone.0093972.s003.pdf [file pone.0093972.s003.pdf]
