# Supplementary material for: Characterization of Human Pseudogene-Derived Non-Coding RNAs for Functional Potential
Source: PubMed Central journal article supplement (PMC3974860; doi:10.1371/journal.pone.0093972), 2014-04-03
Supplement: pone.0093972.s005.pdf [file pone.0093972.s005.pdf]

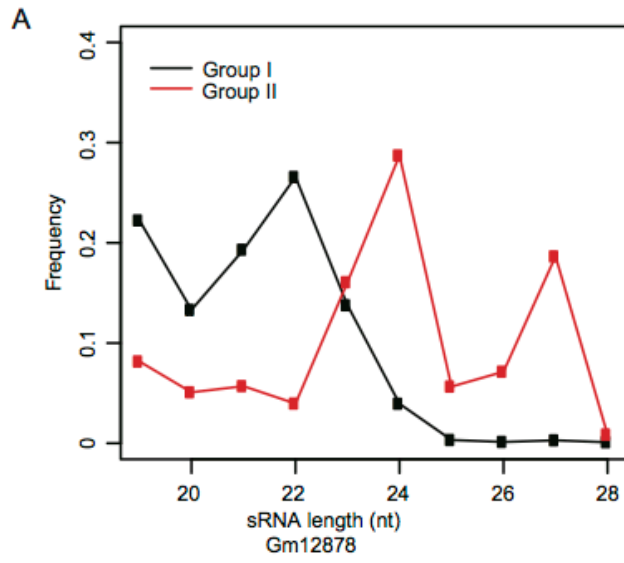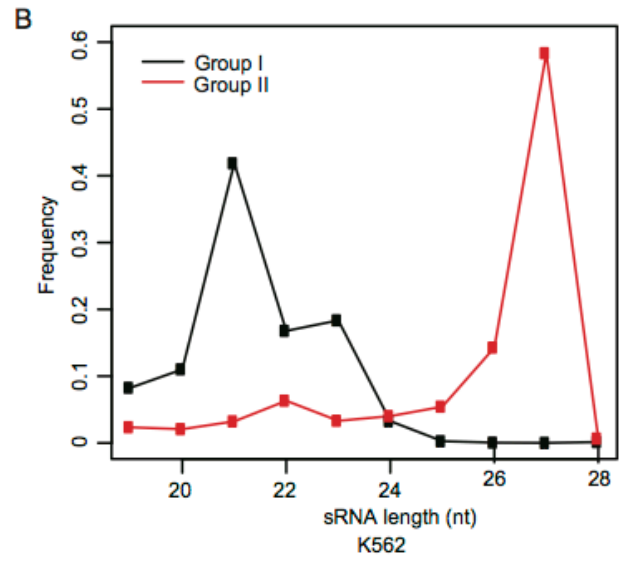

\*\* These distributions were derived from a total of 3,071 and 101,391 mapped sRNA reads for I and II in GM12878, respectively. The total for K562 is 5,971 and 123,364.
