# Supplementary material for: Characterization of Human Pseudogene-Derived Non-Coding RNAs for Functional Potential
Source: PubMed Central journal article supplement (PMC3974860; doi:10.1371/journal.pone.0093972), 2014-04-03

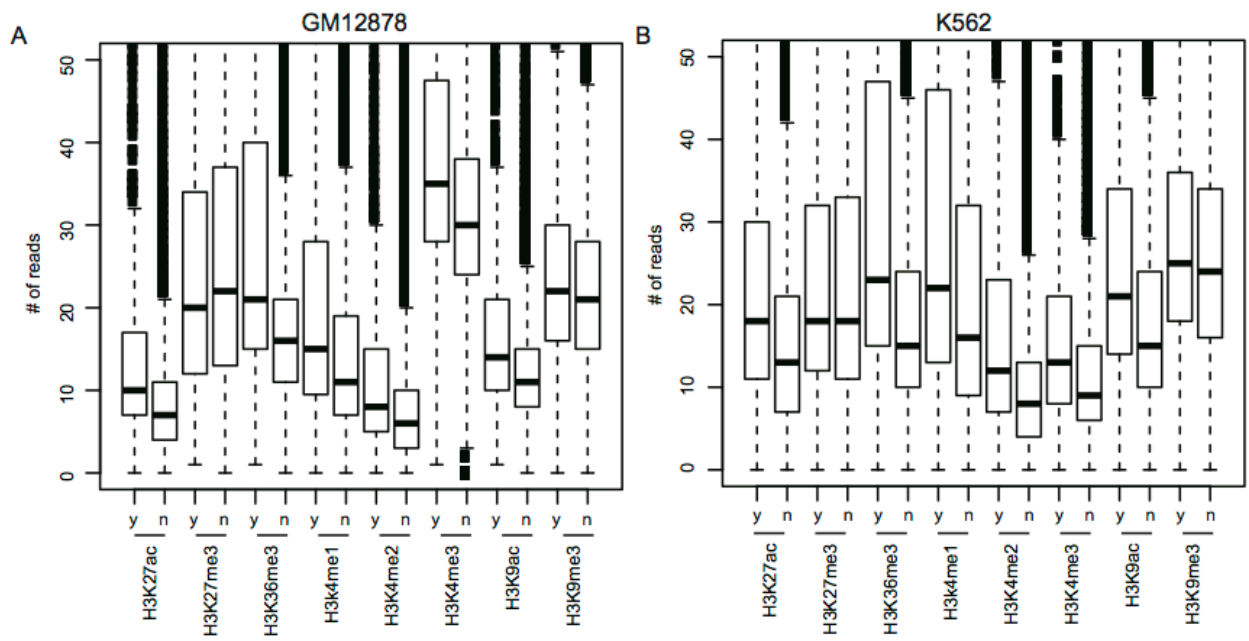

**C**

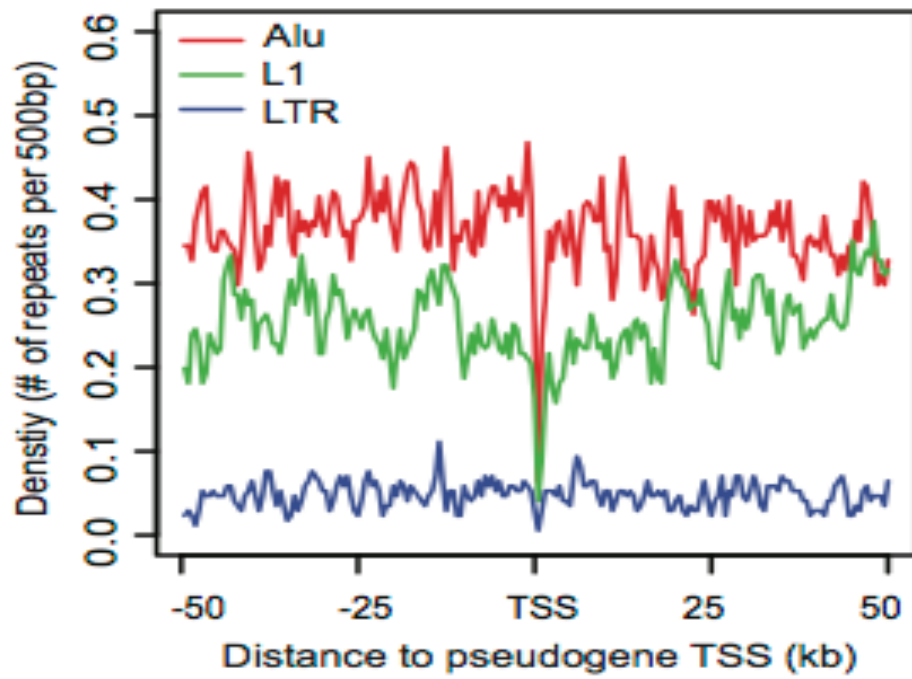

Supplement: pone.0093972.s006.pdf [file pone.0093972.s006.pdf]
